# Supplementary material for: NMR spectroscopy and kinetic studies of the quadruplex forming RNAr(UGGAGGU)
Source: Royal Society of Chemistry journal article supplement (doi:10.1039/b911555b), 2009-08-10
Supplement: b911555b.pdf [file b911555b.pdf]

Table S1.  $^1\text{H}$  Chemical shift assignments of exchangeable protons of r(UGGAGGU) RNA.

| Proton | Assigned $^1\text{H}$ chemical shift |
|--------|--------------------------------------|
| G2 NH1 | 11.35 ppm                            |
| G3 NH1 | 10.98 ppm                            |
| G5 NH1 | 11.17 ppm                            |
| G6 NH1 | 11.29 ppm                            |
| G2 NH2 | 9.98 ppm/ 8.39 ppm                   |
| G3 NH2 | 8.96 ppm / 6.18 ppm                  |
| A4 NH2 | 8.06 ppm/ 6.15 ppm                   |
| G5 NH2 | 9.14 ppm/ 6.16 ppm                   |
| G6 NH2 | 9.43 ppm/ 5.32 ppm                   |
| G2 H8  | 7.97 ppm                             |
| G3 H8  | 7.60 ppm                             |
| A4 H8  | 7.45 ppm                             |
| G5 H8  | 7.76 ppm                             |
| G6 H8  | 6.99 ppm                             |
| A4 H2  | 8.20 ppm                             |
| G2 H1' | 5.35 ppm                             |
| G3 H1' | 5.66 ppm                             |
| A4 H1' | 5.47 pm                              |
| G5 H1' | 5.67 ppm                             |
